# Supplementary material for: Reassess Young Breast Cancer Risk Factor in Mainland of Penang, Malaysia
Source: Research Square preprint supplement (doi:10.21203/rs.3.rs-274313/v1), 2021-03-11
Supplement: Supplementary file 1 [file 737d6fe89e10c5db97afedba.docx]

**Table 1 Socio-demographic characteristic of cases and controls in HSJ Cluster**

| **Variable** | Case (N = 41) | | Control (N = 41) | |
| --- | --- | --- | --- | --- |
| N | % | N | % |
| Age |  |  |  |  |
| 16 – 20 | 0 | 0.0 | 5 | 12.2 |
| 21 – 25 | 1 | 2.4 | 7 | 17.1 |
| 26 – 30 | 4 | 9.8 | 6 | 14.6 |
| 31 – 35 | 11 | 26.8 | 11 | 26.8 |
| 36 – 40 | 25 | 61.0 | 12 | 29.3 |
| **Ethnicity** |  |  |  |  |
| Malay | 35 | 85.4 | 28 | 68.3 |
| Chinese | 5 | 12.2 | 6 | 14.6 |
| Indian | 1 | 2.4 | 7 | 17.1 |

**Table 2 Exogenous hormonal, reproductive factor and menarche and their association with young breast cancer**

| **Variable** | **Case** | | **Control** | | **P-value** |
| --- | --- | --- | --- | --- | --- |
|  | **N** | **%** | **N** | **%** |  |
| **OCP use** |  | | | | |
| No | 12 | 29.3 | 35 | 85.4 | 0.000 |
| Yes | 29 | 70.7 | 6 | 14.6 |
| **Full term pregnancy** |  | | | | |
| Nulliparous | 5 | 12.20 | 18 | 43.9 | 0.003 |
| Yes | 36 | 87.80 | 23 | 56.1 |
| **Breastfeeding** |  | | | | |
| Never | 10 | 24.4 | 20 | 48.8 | 0.038 |
| Ever | 31 | 75.6 | 21 | 51.2 |
| **Breastfeeding duration** |  | | | | |
| < 12 months | 2 | 6.5 | 10 | 47.6 | 0.002 |
| 12 months and above | 29 | 93.5 | 11 | 52.4 |
| **Age of menarche** |  | | | | |
| ≤ 12 years old | 28 | 68.3 | 7 | 17.1 | 0.026 |
| >12 years old | 13 | 31.7 | 34 | 82.9 |
| **Primary family history of breast cancer** |  | | | | |
| No | 27 | 65.9 | 39 | 95.1 | 0.002 |
| Yes | 14 | 34.1 | 2 | 4.9 |
